# Supplementary material for: The current limit and self-rectification functionalities in the TiO2/HfO2 resistive switching material system
Source: Royal Society of Chemistry journal article supplement (doi:10.1039/c7nr02215h), 2017-01-01
Supplement: c7nr02215h1.pdf [file c7nr02215h1.pdf]

## Supplementary Information

# Current-Limit and Self-rectification Functionalities in TiO<sub>2</sub>/HfO<sub>2</sub> Resistive Switching Material System

*Jung Ho Yoon, Dae Eun Kwon, Yumin Kim, Young Jae Kwon, Kyung Jean Yoon, Tae Hyung  
Park, Xing Long Shao, and Cheol Seong Hwang\**

Department of Materials Science and Engineering and Inter-University Semiconductor  
Research Center, Seoul National University, Seoul 151-744, Republic of Korea

\*E-mail: [cheolsh@snu.ac.kr](mailto:cheolsh@snu.ac.kr)

Supplementary Information 1.

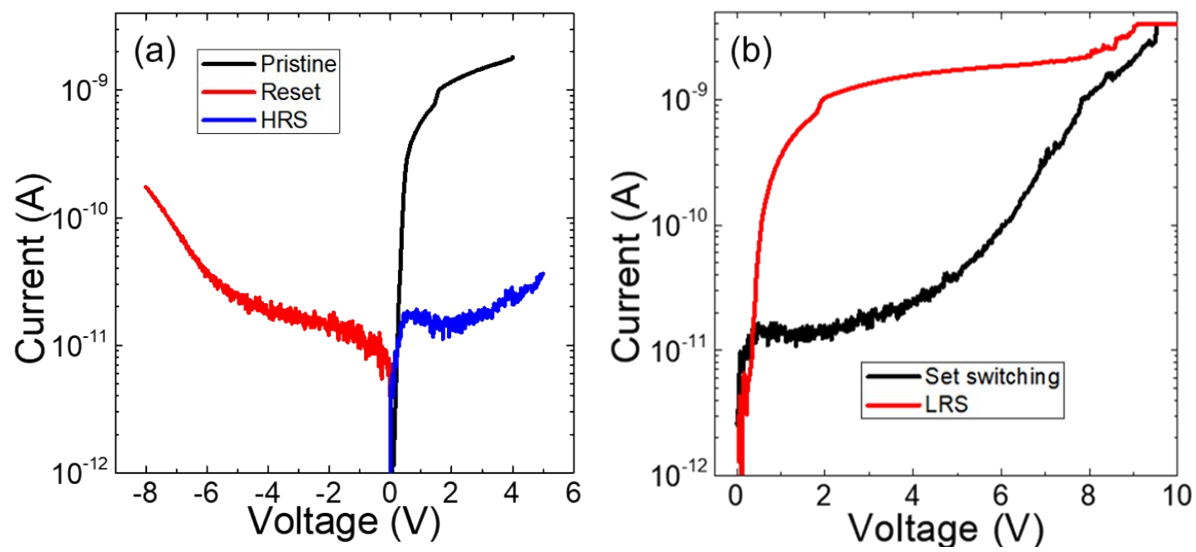

**Figure S1.** (a) Reset switching and (b) Set switching I – V curves of eBRS-Ti system.

Supplementary Information 2.

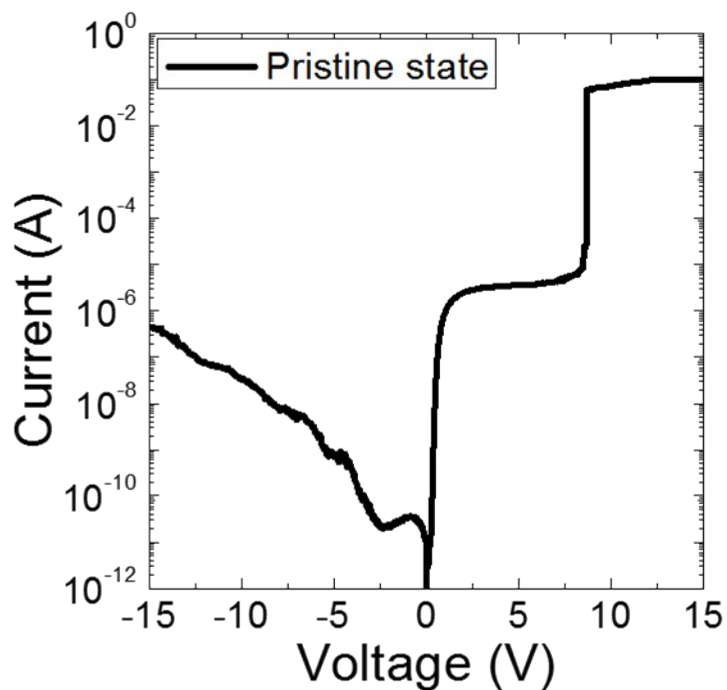

**Figure S2.** The I – V curves in pristine state of Pt/TiO<sub>2</sub>(40nm)/HfO<sub>2</sub>(10nm)/TiN. TiO<sub>2</sub> is deposited on the HfO<sub>2</sub> using plasma enhance ALD system with the Ti(O(C<sub>3</sub>H<sub>7</sub>))<sub>4</sub> and plasma-enhanced O<sub>2</sub> using a different ALD tool, while the HfO<sub>2</sub> layer was grown by the identical ALD process as in the main text.

Supplementary Information 3.

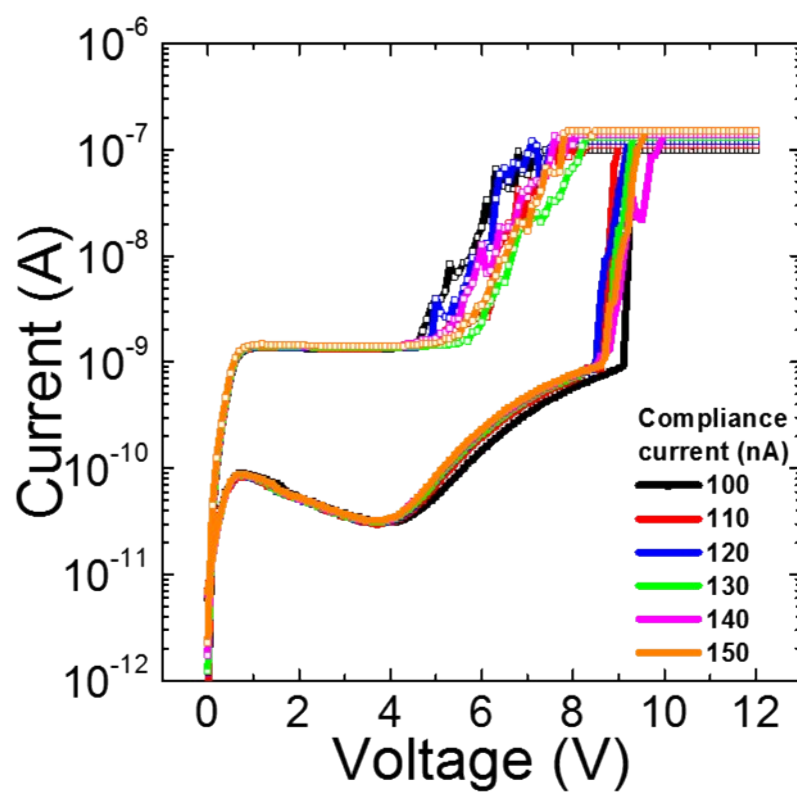

**Figure S3.** The I – V curves of set switching and in LRS with different  $I_{cc}$ .
